# Supplementary material for: UAV-Based Multi-Temporal Thermal Imaging to Evaluate Wheat Drought Resistance in Different Deficit Irrigation Regimes
Source: MDPI journal article supplement (doi:10.3390/rs14215608), 2022-11-07
Supplement: s1 [file s1]

**Table S1.** Linear relationship between canopy temperature extracted by UAV thermal infrared imagery and canopy temperature measured by hand-held infrared analyzer.

| Date   | Linear formula     | R <sup>2</sup> value | RMSE (°C) |
|--------|--------------------|----------------------|-----------|
| 5 May  | $y = 0.96x - 0.31$ | 0.76                 | 0.93      |
| 11 May | $y = 0.7x + 6.77$  | 0.65                 | 0.31      |
| 20 May | $y = 0.76x + 9.27$ | 0.83                 | 0.80      |
| 25 May | $y = 0.76x + 6.3$  | 0.88                 | 0.59      |
| 2 June | $y = 1.07x - 0.79$ | 0.90                 | 0.65      |

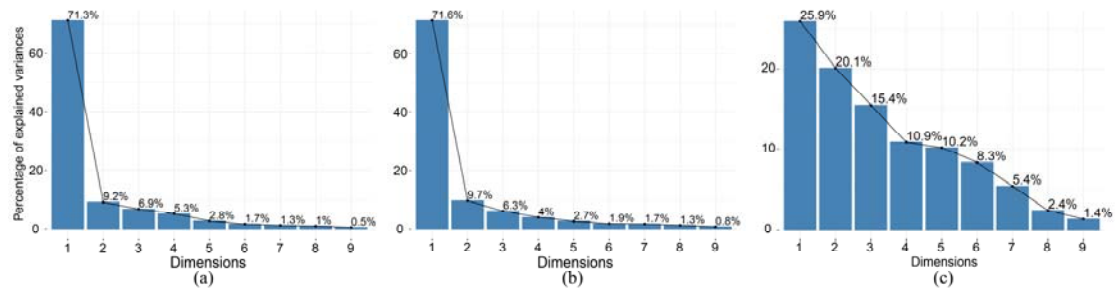

**Figure S1.** Scree plot to express the degree of explanation of each principal component to the total variance in three water deficit treatments. (a) W0, no irrigation during the growing season, (b) W1, irrigation at jointing, (c) and W2, irrigation at jointing and anthesis.
